# Supplementary material for: Assessment of the Relationship between Clinical Manifestation and Pathogenic Potential of Streptococcus pyogenes Strains-Distribution of Genes and Genotypes of Toxins
Source: MDPI journal article supplement (doi:10.3390/biomedicines10040799), 2022-03-29
Supplement: s1 [file s1]

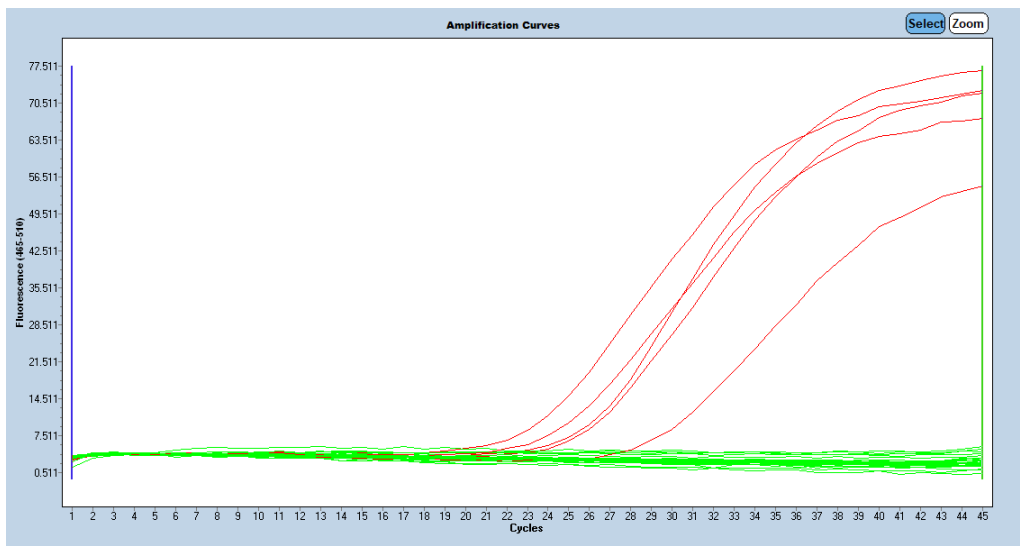

(a)

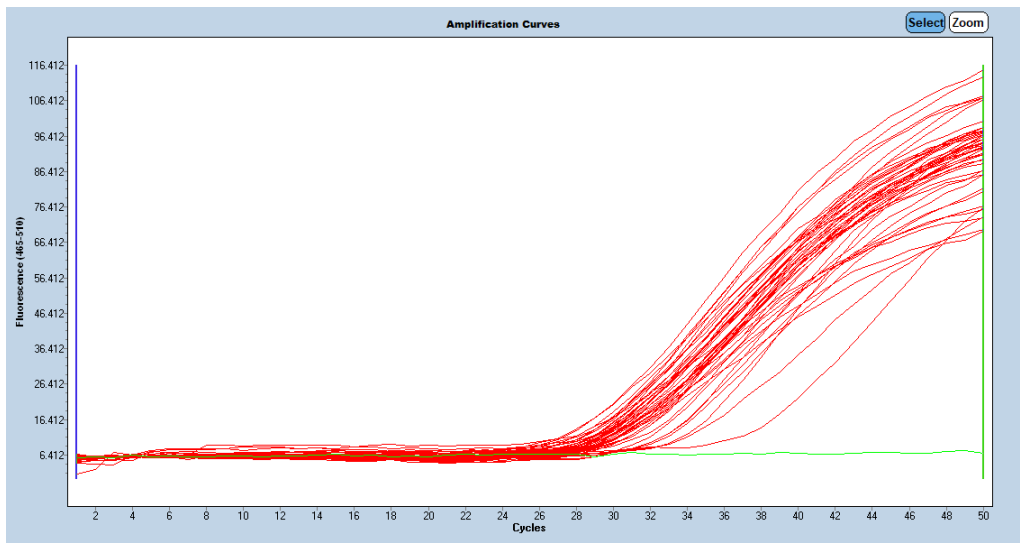

(b)

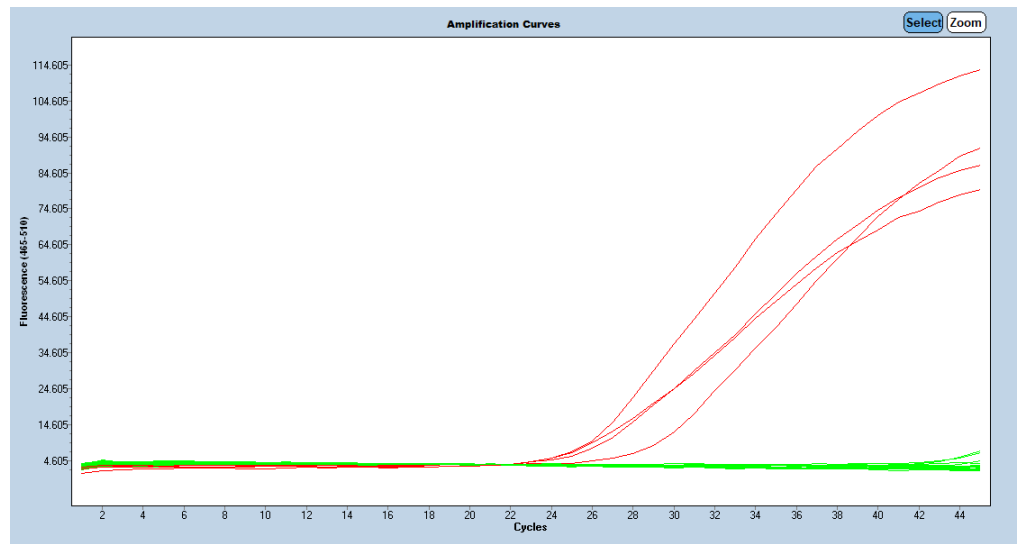

(c)

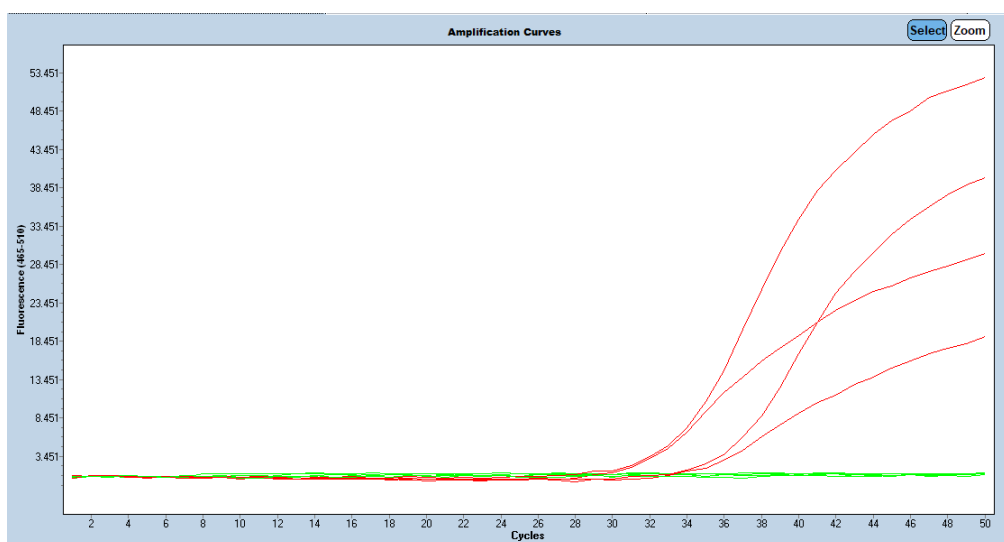

(d)

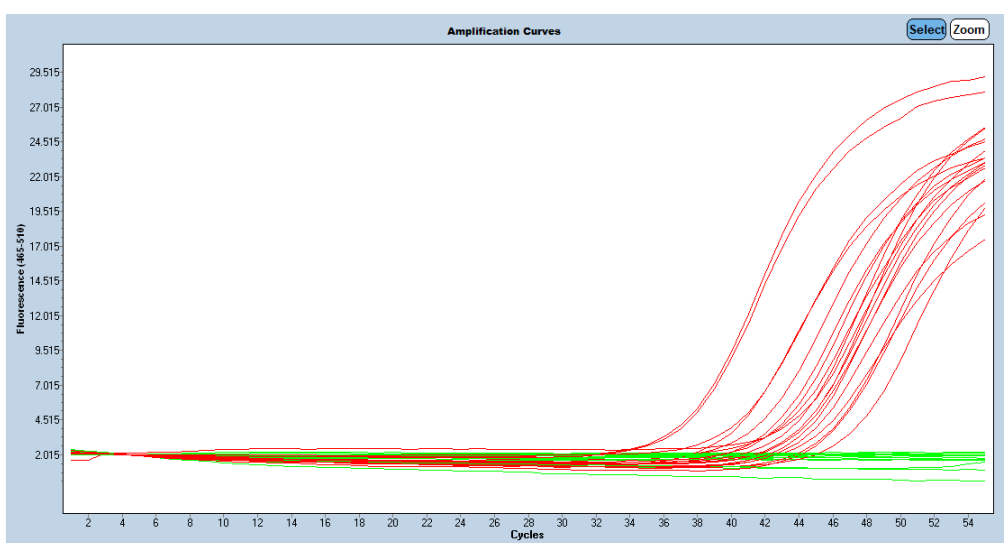

(e)

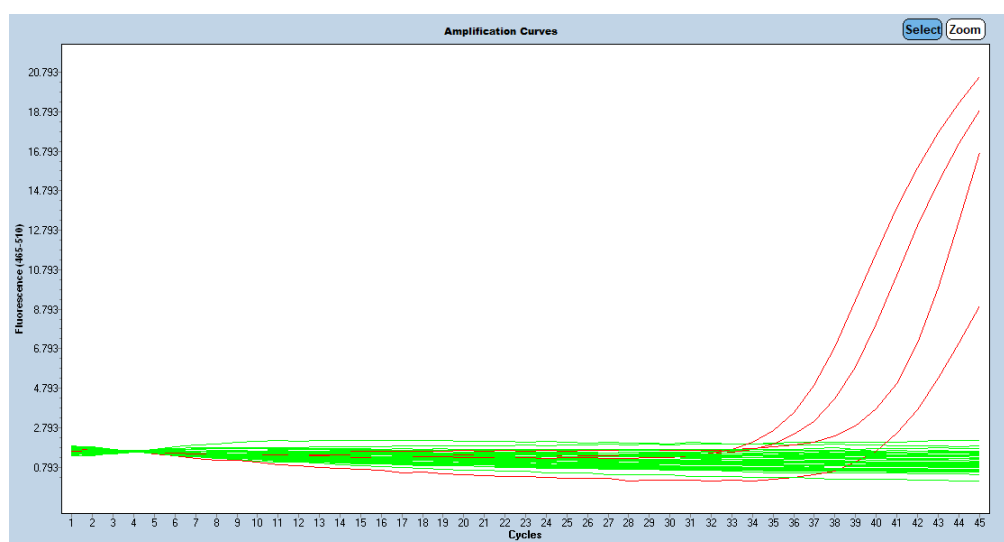

(f)

**Figure S1.** The examples of pictures showing results of real-time PCR (amplification curves) for detection of *speA* gene (a), *speB* gene (b), *speC* gene (c), *speH* gene (d), *speJ* gene (e) and *speK* gene (f); (red curves – positive results and positive control; green curves – negative results and negative control) .

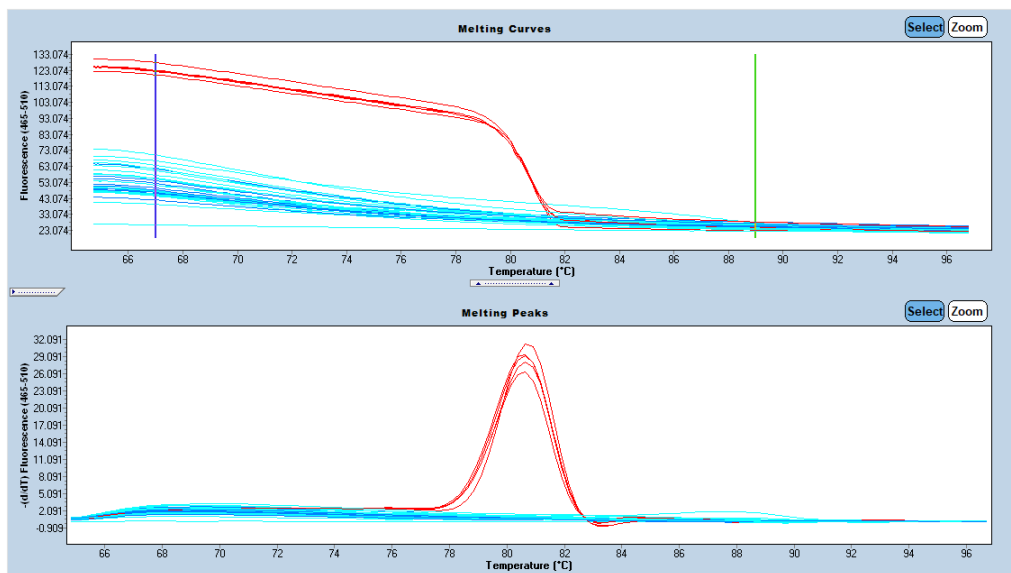

(a)

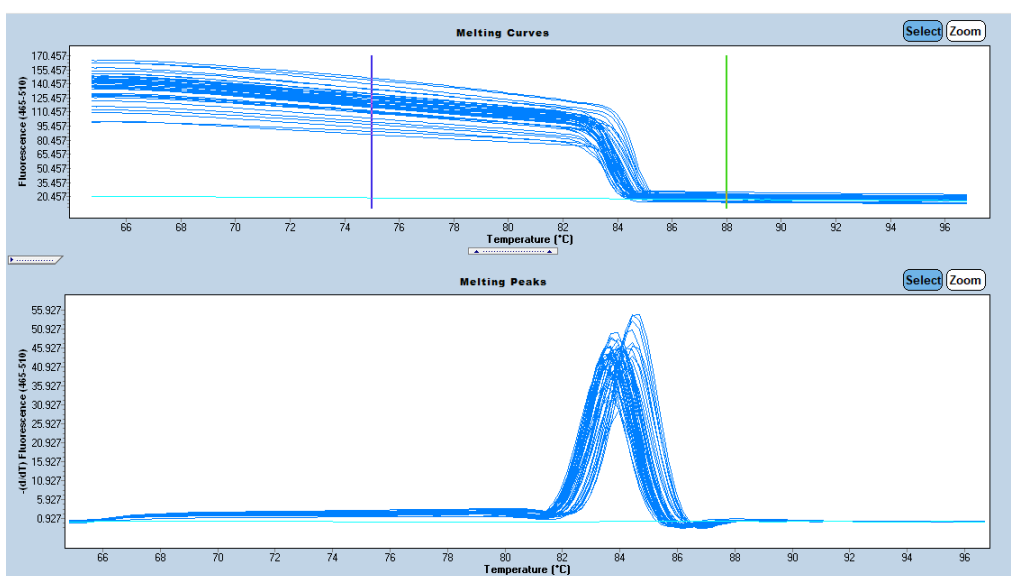

(b)

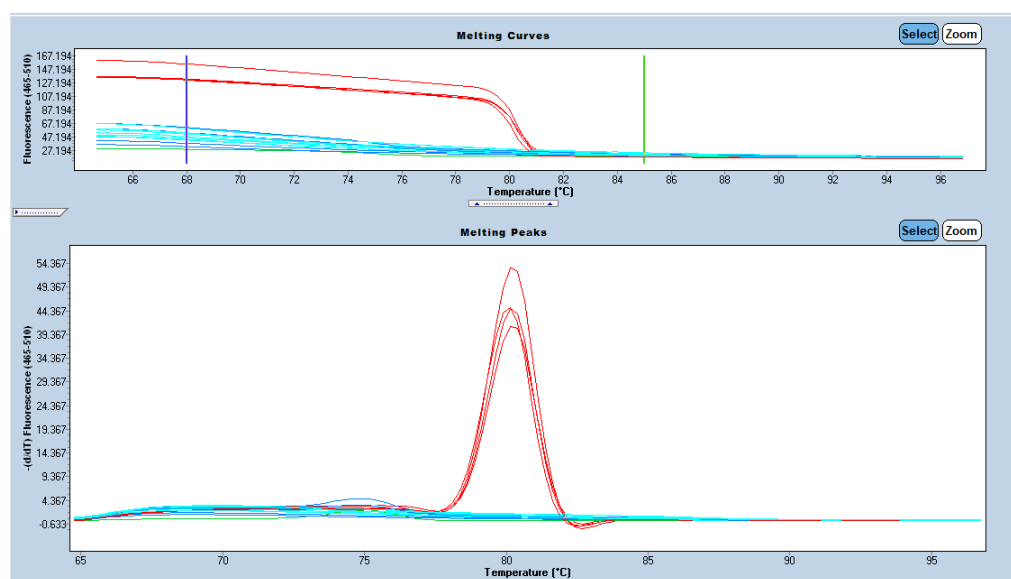

(c)

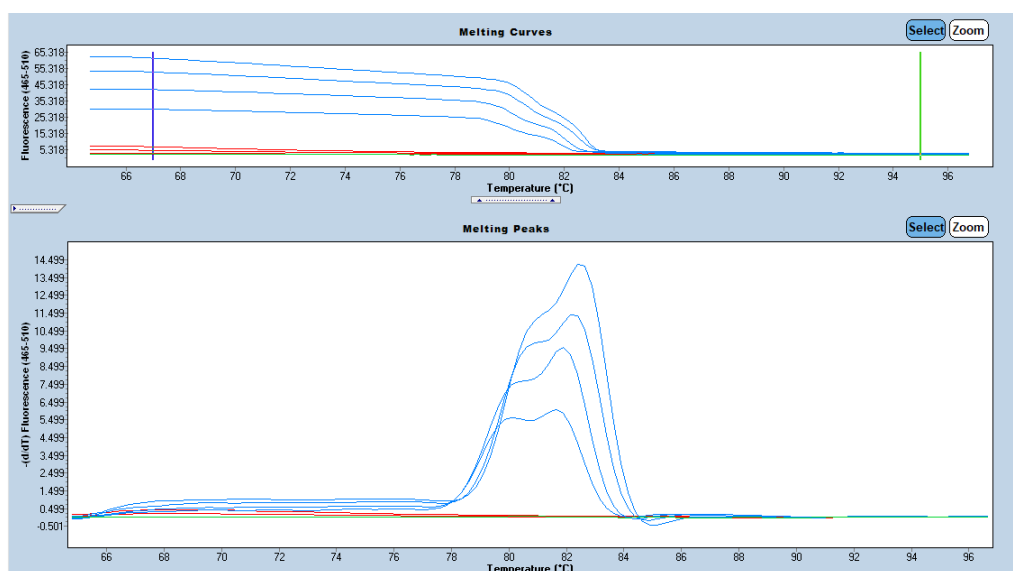

(d)

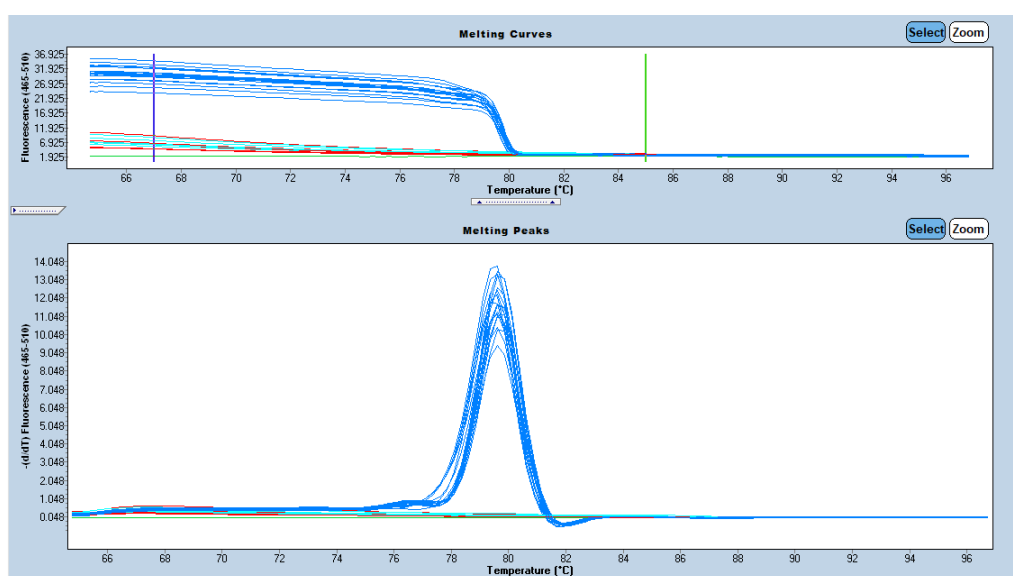

(e)

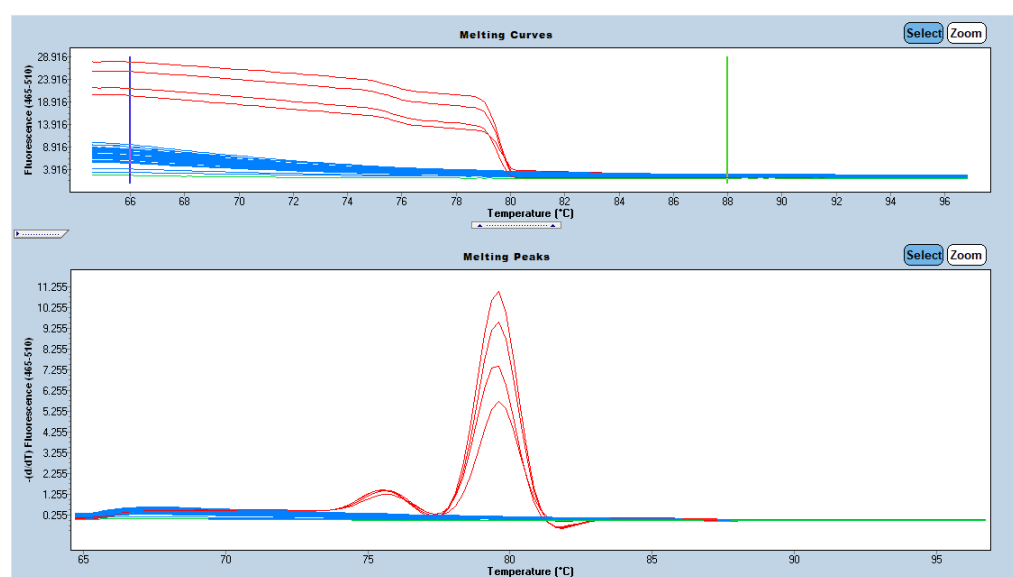

(f)

**Figure S2.** The examples of melting curves and melting peaks pictures showing specificity of the real-time PCR product for the confirmation of the following genes detection: of *speA* (a), *speB* (b), *speC* (c), *speH* (d), *speJ* (e) and *speK* (f); (red lines - a, c, f, blue lines - b, d, e).

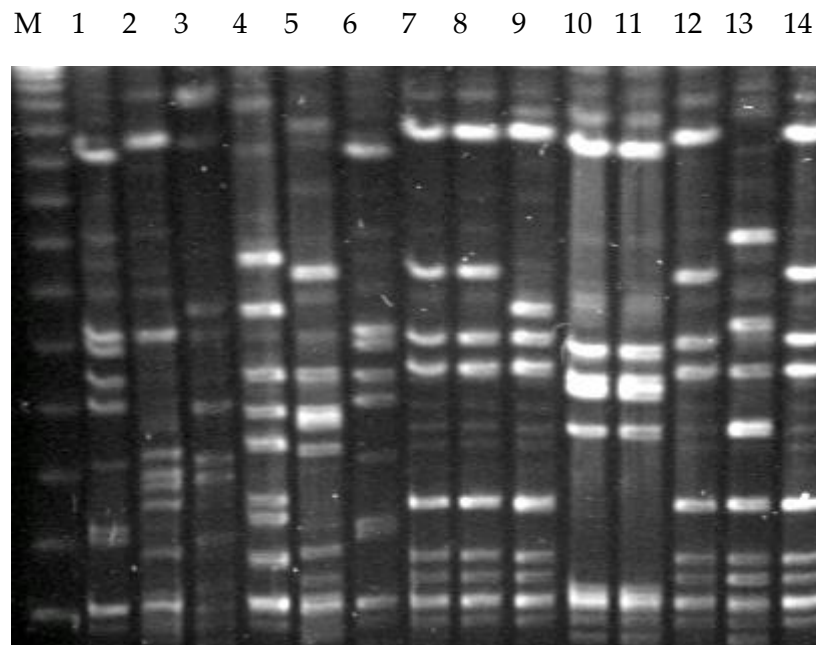

**Figure S3.** An example of the gel picture showing electrophoretic resolution of bacterial DNA and the corresponding PFGE patterns for the selected group of strains; 1-14 numbers of the examined strains, M – DNA size marker .

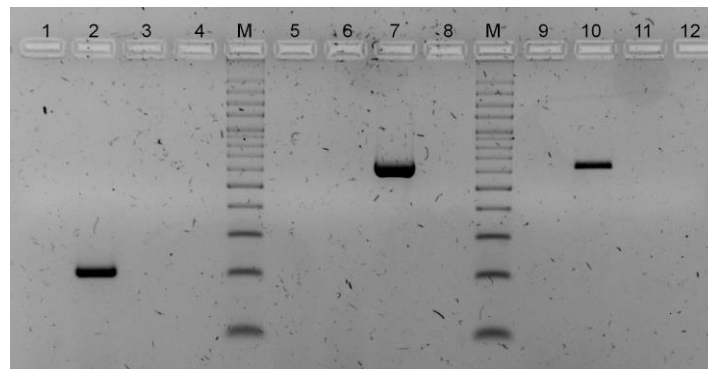

**Figure S4.** An example of the gel picture showing electrophoretic resolution of bacterial DNA amplification with conventional PCR, the study performed additionally to confirm the sizes of the amplification product for a particular gene and specificity of the applied real-time PCR methodology; 1-4 *speA* gene – 200 bp, 5-8 *speH* gene – 630 bp, 9-12 *speJ* gene – 639 bp, M – DNA size marker (100-3.000 bp) .

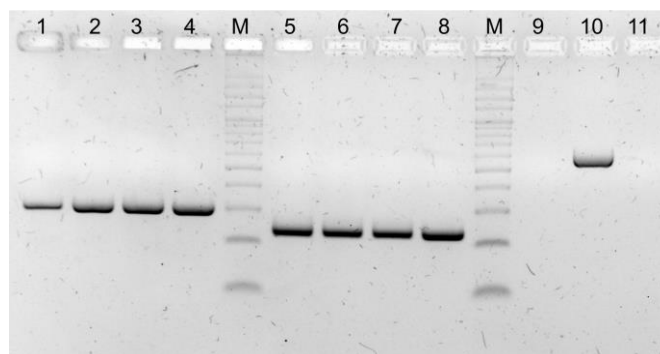

**Figure S5.** An example of the gel picture showing electrophoretic resolution of bacterial DNA amplification with conventional PCR, the study performed additionally to confirm the sizes of the amplification product for a particular gene and specificity of the applied real-time PCR methodology; 1-4 *speB* gene – 300 bp, 5-8 *speC* gene – 246 bp, 9-11 *speK* gene – 564 bp, M – DNA size marker (100-3.000 bp).

**Table S1.** The detailed origin (units) of the examined *S. pyogenes* strains (initial group of 168 isolates).

| Name of the unit and the number of isolates per particular unit |                                                                               | Number of strains<br>( <i>n</i> = 168) | %    |
|-----------------------------------------------------------------|-------------------------------------------------------------------------------|----------------------------------------|------|
| Surgery Departments                                             | Department of Liver and General Surgery – 33                                  | 54                                     | 32.0 |
|                                                                 | Department of Vascular Surgery and Angiology – 10                             |                                        |      |
|                                                                 | Department of General and Oncological Paediatric Surgery – 4                  |                                        |      |
|                                                                 | Department of Neurosurgery, Neurotraumatology and Paediatric Neurosurgery – 3 |                                        |      |
|                                                                 | Department of Orthopaedics and Traumatology – 3                               |                                        |      |
| Outpatient and external                                         |                                                                               | 47                                     | 28.0 |
| Clinics                                                         | Trauma and Orthopedic – 7                                                     | 18                                     | 10.7 |
|                                                                 | Paediatric Surgery – 4                                                        |                                        |      |
|                                                                 | Surgery – 3                                                                   |                                        |      |
|                                                                 | Paediatric Hematology and Oncology – 1                                        |                                        |      |
|                                                                 | Paediatric Gastroenterology – 1                                               |                                        |      |
|                                                                 | Nutrition – 1                                                                 |                                        |      |
|                                                                 | Dermatology and Venerology – 1                                                |                                        |      |
| Dermatology Department                                          |                                                                               | 10                                     | 6.0  |
| Otolaryngology                                                  | Clinic – 5                                                                    | 9                                      | 5.4  |
|                                                                 | Department – 4                                                                |                                        |      |
| Department of Cardiology                                        |                                                                               | 8                                      | 4.8  |
| Department of Nephrology, Hypertension and Internal Medicine    |                                                                               | 6                                      | 3.6  |
| The rest                                                        | Department of Anaesthesiology and Intensive Care – 3                          | 16                                     | 9.5  |
|                                                                 | Department of Endocrinology and Diabetology – 3                               |                                        |      |
|                                                                 | Department of Emergency Medicine – 2                                          |                                        |      |
|                                                                 | Department of Forensic Medicine – 2                                           |                                        |      |
|                                                                 | Department of Paediatrics, Haematology and Oncology – 1                       |                                        |      |
|                                                                 | Department of Geriatrics – 1                                                  |                                        |      |
|                                                                 | Department of Neurology – 2                                                   |                                        |      |
|                                                                 | Department of Paediatrics, Allergology and Gastroenterology – 1               |                                        |      |
| Department of Ophthalmology – 1                                 |                                                                               |                                        |      |

**Table S2.** The detailed origin (clinical specimen) of the examined *S. pyogenes* strains (initial group of 168 isolates) .

| Specimen                                                                                                                                                                                                                 | <i>n</i> = 168 | %    |
|--------------------------------------------------------------------------------------------------------------------------------------------------------------------------------------------------------------------------|----------------|------|
| Wound swab                                                                                                                                                                                                               | 65             | 38.7 |
| Throat swab                                                                                                                                                                                                              | 33             | 19.6 |
| Pus samples                                                                                                                                                                                                              | 20             | 11.9 |
| Sore swab                                                                                                                                                                                                                | 13             | 7.7  |
| Blood samples                                                                                                                                                                                                            | 13             | 7.7  |
| Nose swab                                                                                                                                                                                                                | 7              | 4.2  |
| Skin swab                                                                                                                                                                                                                | 3              | 1.8  |
| The rest: ear swab - 2, tissue - 2, skin lesion swab – 2, stool sample – 1, rectal swab - 1, broncho-alveolar lavage – 1, vaginal swab – 1, eye swab - 1, urethral swab - 1, pleural fluid – 1, catheter outlet swab – 1 | 14             | 8.3  |
